# Supplementary material for: Solvothermal synthesis and enhanced photo-electrochemical performance of hierarchically structured strontium titanate micro-particles
Source: Royal Society of Chemistry journal article supplement (doi:10.1039/c7dt03024j), 2017-01-01
Supplement: c7dt03024j1.pdf [file c7dt03024j1.pdf]

Supplementary Information:

**Solvothermal synthesis and enhanced photo-electrochemical performance  
of hierarchically structured strontium titanate micro-particles**

Tao Zhang,<sup>a</sup> Thomas Doert\*<sup>a</sup> and Michael Ruck<sup>ab</sup>

*<sup>a</sup> Department of Chemistry and Food Chemistry, Technische Universität Dresden, 01062  
Dresden, Germany*

*<sup>b</sup> Max Planck Institute for Chemical Physics of Solids, 01187 Dresden, Germany*

\* E-mail: [thomas.doert@tu-dresden.de](mailto:thomas.doert@tu-dresden.de)

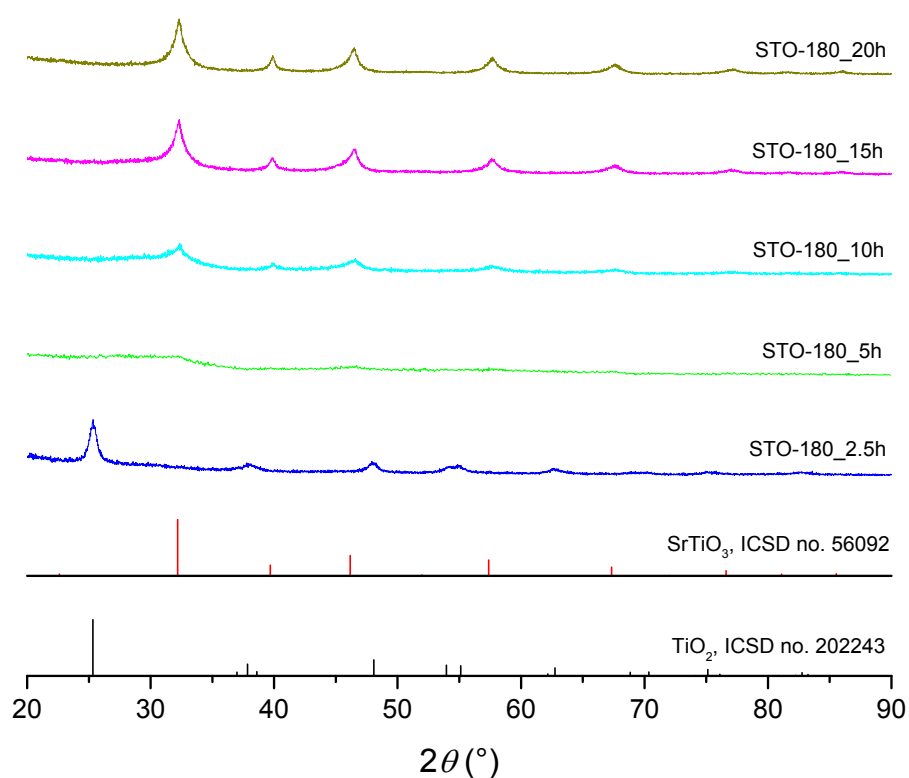

**Fig. S1** PXRD patterns of SrTiO<sub>3</sub> samples synthesized at 180 °C with different reaction times after calcination at 450 °C in air for 2h.

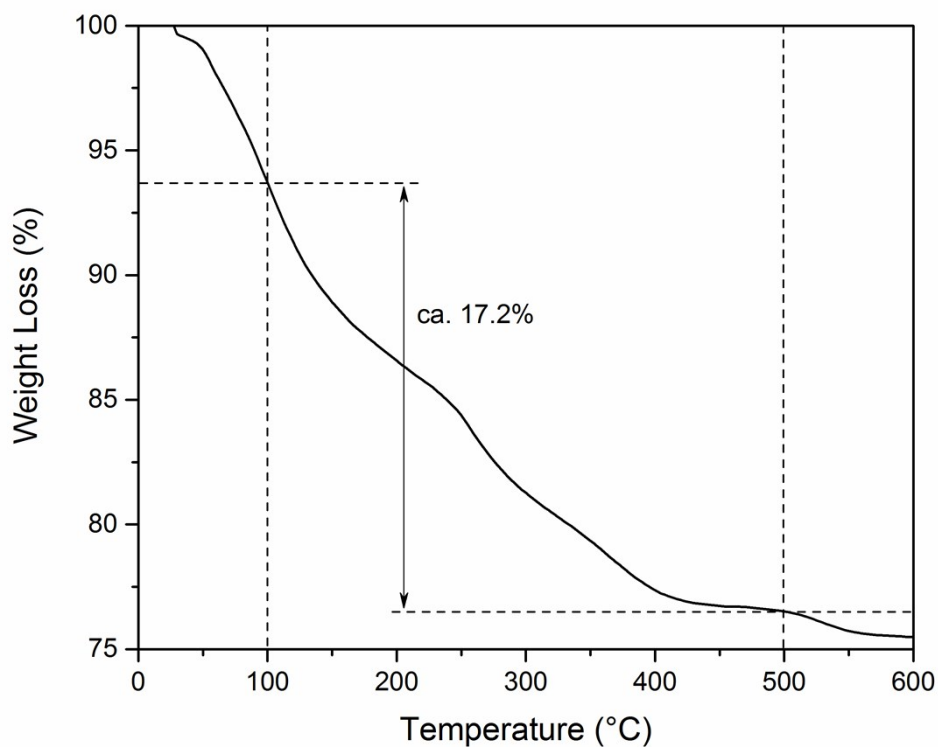

**Fig. S2** The TGA curve of the SrTiO<sub>3</sub> sample synthesized at 180 °C for 2.5 h.

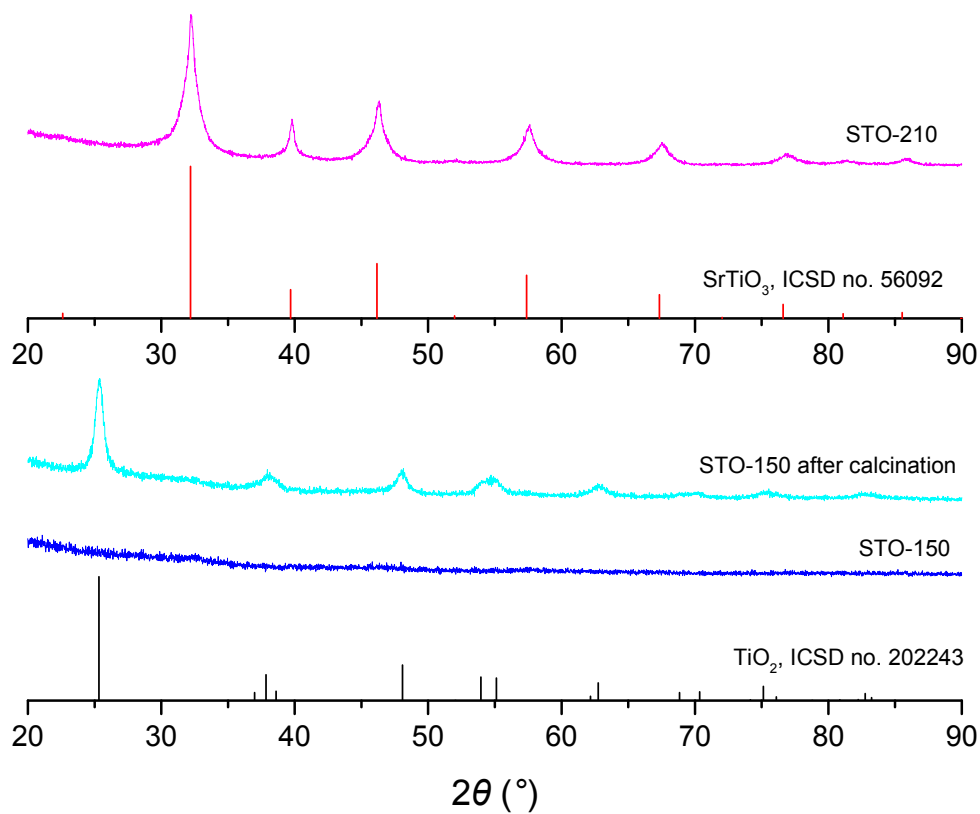

**Fig. S3** PXR D patterns of as-synthesized STO-150 sample, STO-210 sample, and STO-150 sample after calcination at 450 °C in air for 2h.

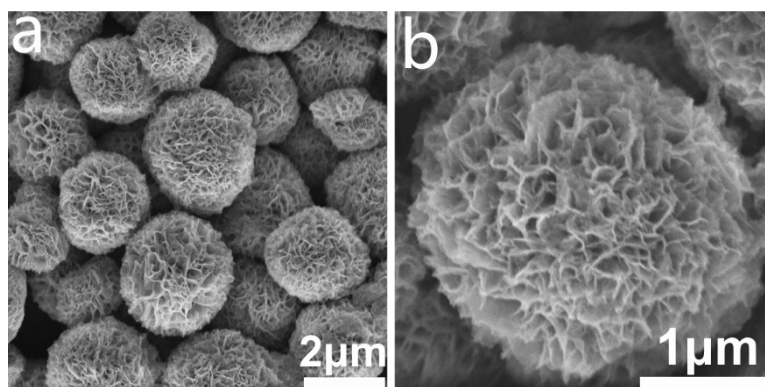

**Fig. S4** SEM images for as-synthesized STO-150 samples.

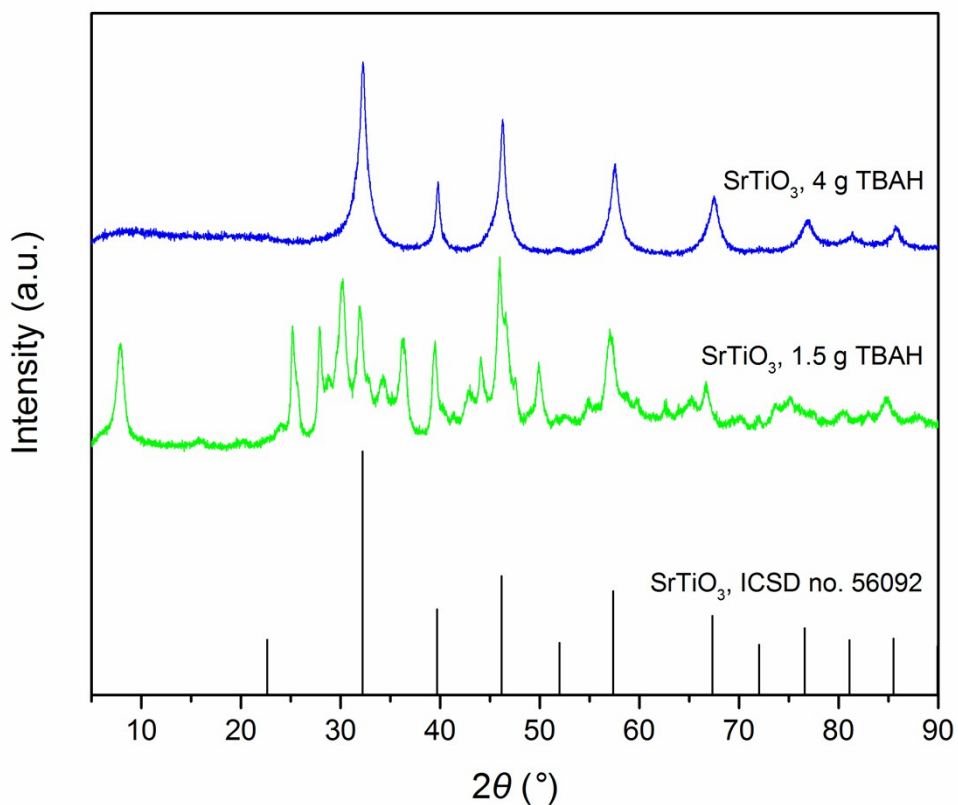

**Fig. S5** PXRD patterns of as-obtained SrTiO<sub>3</sub> samples using different amount of TBAH as reactants. The Ti-based product yields are 73.7% SrTiO<sub>3</sub> (135.2 mg) for the sample using 1.5 g TBAH as the reactant and 77.9% (143.0 mg) for the sample using 4 g TBAH as the reactant, respectively.

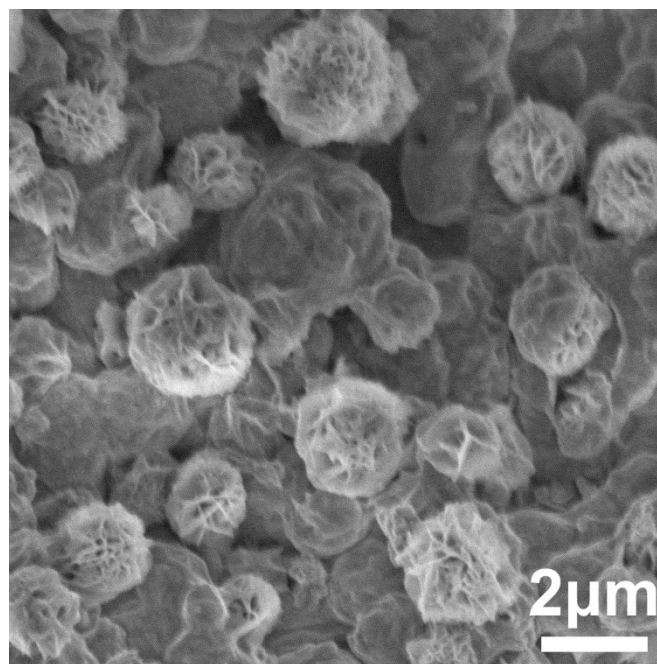

**Fig. S6** SEM image of as-obtained SrTiO<sub>3</sub> samples using 1.5 g TBAH as the reactant.

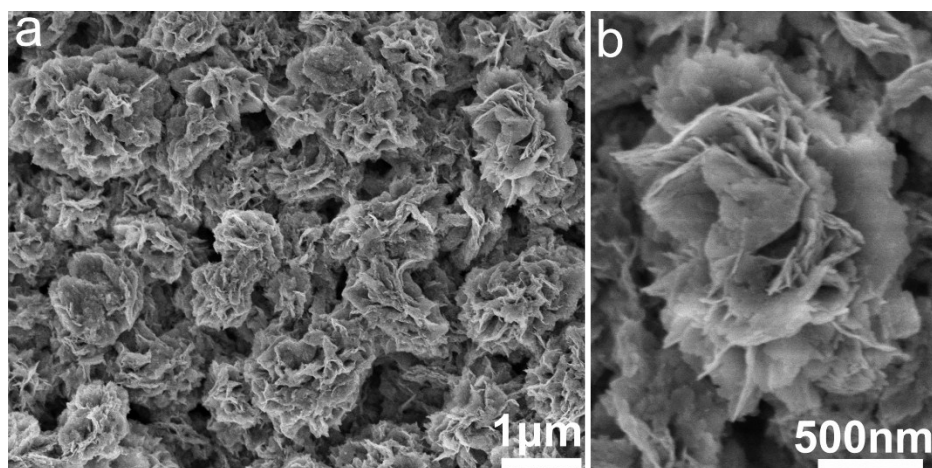

**Fig. S7** SEM images of as-obtained SrTiO<sub>3</sub> samples using 4 g TBAH as the reactant.

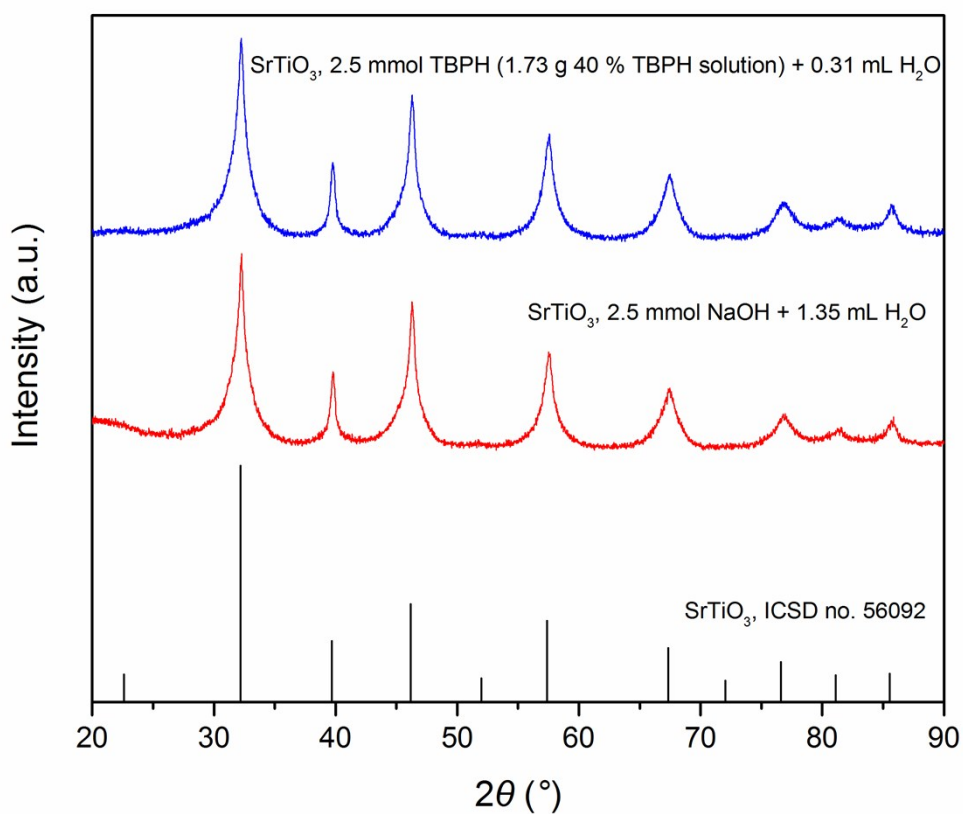

**Fig. S8** PXRD patterns of as-obtained SrTiO<sub>3</sub> samples using NaOH and tetrabutylphosphonium hydroxide (TBPH) as reactants. The Ti-based yields are 73.4% (134.7 mg) for the sample using NaOH as the reactant and 80.9% (148.5 mg) for the sample using TBPH as the reactant, respectively.

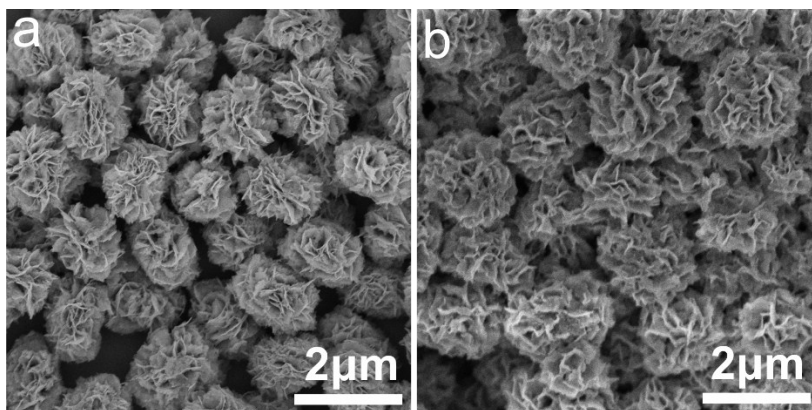

**Fig. S9** SEM image of as-obtained SrTiO<sub>3</sub> samples using NaOH (a) and TBPH (b) as the reactants, respectively.

### **Electrophoretic preparation of the Ti/SrTiO<sub>3</sub> photoelectrode**

The SrTiO<sub>3</sub> photoelectrode was prepared by an electrophoretic deposition method. Typically, 50 mg of ground SrTiO<sub>3</sub> powder were dispersed in 100 mL isopropanol. A small amount of Mg(NO<sub>3</sub>)<sub>2</sub>·6H<sub>2</sub>O (10<sup>-3</sup> M; ≈ 25 mg) was added into the suspension in order to generate positive surface charges on the perovskite (by absorption of Mg<sup>2+</sup> ions) and to facilitate electro-migration. The suspension was continuously stirred for one hour and sonicated for 30 minutes at room temperature. For the electrophoretic deposition, the titanium foil was used as working electrode and a platinum foil was used as the counter electrode. A constant working voltage was set to 50 V and the electrophoretic deposition process was performed for 10 minutes. The final SrTiO<sub>3</sub>-coated titanium foil was washed with distilled water to remove residual isopropanol and Mg(NO<sub>3</sub>)<sub>2</sub> salt and dried at room temperature in the air before using.
